# Supplementary material for: Genome-Wide Association Studies Reveal Genetic Variation and Candidate Genes of Drought Stress Related Traits in Cotton (Gossypium hirsutum L.)
Source: Front Plant Sci. 2018 Sep 3;9:1276. doi: 10.3389/fpls.2018.01276 (PMC6129771; doi:10.3389/fpls.2018.01276)
Supplement: TABLE S4 — Loading matrix of each in six principal components. [file Table_4.xlsx]

## Sheet: Sheet1
TABLE S4 Loading matrix of each in six principal components
Traits	Common factors
	1	2	3	4	5	6
RPH	-0.0150671	0.920937	-0.109086	-0.0322127	0.0336197	0.130216
RSDM	-0.0893791	0.925113	0.0218882	0.102046	-0.0643113	0.053922
RRDM	0.0324539	0.156843	0.0141932	-0.00839686	0.000300389	0.98392
RPC	0.890253	-0.0434726	-0.00319632	-0.0574273	0.0543893	0.0402713
RSOD	0.213728	-0.0656105	0.951735	0.00960158	0.00685023	-0.00542786
RMDA	0.731845	-0.0520932	0.501801	-0.118438	0.00608909	0.115992
RSS	0.832519	-0.043453	0.158097	-0.020001	-0.0669918	-0.0542777
RHL	-0.100572	0.0569637	-0.0102483	0.98877	0.0669314	-0.00842886
RGP	-0.00647683	-0.0256786	0.00730913	0.0654378	0.995213	0.000384087
* RPH: relative plant height; RSDM: relative shoot dry matter; RRDM: relative root dry matter; RPC: relative proline content; RSOD: relative superoxide dismutase; RMDA: relative malonaldehyde ; RSS: relative soluble sugar; RHL: relative hypocotyl length; RGP: relative germination percentage.
